# Supplementary material for: DNA Methylation and Expression of the EgDEF1 Gene and Neighboring Retrotransposons in mantled Somaclonal Variants of Oil Palm
Source: PLOS journal article supplement (doi:10.1371/journal.pone.0091896), 2014-03-17
Supplement: S9 (10.1371/journal.pone.0091896.s009) [file journal.pone.0091896.s009]

**Table S1: Genetic origin of the plant material.**

| Clonal line | Origin      | Pedigree                      |
|-------------|-------------|-------------------------------|
| FC166       | Malaysia    | D3D x L238T                   |
| FC2317      | Malaysia    | EMB x (L718T x L322P)         |
| FC2318      | Malaysia    | ELP x (L718T x L718T)         |
| FC2405      | Malaysia    | ELP1 x BAA5                   |
| L2T         | Ivory Coast | L2T                           |
| LMC51       | Ivory Coast | L2T x D8D                     |
| LMC343      | Ivory Coast | (D115D x D115D) x (L2T x L2T) |

Conventionally, crosses are given under the form “male parent x female parent”.
