# Supplementary material for: DNA Methylation and Expression of the EgDEF1 Gene and Neighboring Retrotransposons in mantled Somaclonal Variants of Oil Palm
Source: PLOS journal article supplement (doi:10.1371/journal.pone.0091896), 2014-03-17
Supplement: S15 (10.1371/journal.pone.0091896.s015) [file journal.pone.0091896.s015]

**Table S7 : Allele-specific analysis of DNA methylation within the G3 region of the *Koala* retrotransposon.**

| Tissue   | PCR<br>fragment | % methylated |             |            | total<br>methylation<br>(%) | n         |
|----------|-----------------|--------------|-------------|------------|-----------------------------|-----------|
|          |                 | CG sites     | CHG sites   | CHH sites  |                             |           |
| N male   | G3-a1           | 100.0        | 91.6        | 4.2        | 23.1                        | 16        |
|          | G3-a2           | 97.9         | 85.3        | 3.9        | 24.1                        | 20        |
|          | <b>average</b>  | <b>98.8</b>  | <b>88.1</b> | <b>4.1</b> | <b>23.7</b>                 | <b>36</b> |
| M male   | G3-a1           | 95.0         | 86.1        | 4.1        | 22.0                        | 15        |
|          | G3-a2           | 98.3         | 81.5        | 3.3        | 23.1                        | 16        |
|          | <b>average</b>  | <b>96.7</b>  | <b>83.7</b> | <b>3.7</b> | <b>22.6</b>                 | <b>31</b> |
| N female | G3-a1           | 95.7         | 90.9        | 4.8        | 23.2                        | 16        |
|          | G3-a2           | 99.1         | 81.1        | 2.3        | 22.2                        | 19        |
|          | <b>average</b>  | <b>97.6</b>  | <b>85.6</b> | <b>3.5</b> | <b>22.7</b>                 | <b>35</b> |
| M female | G3-a1           | 97.2         | 88.9        | 4.5        | 22.7                        | 18        |
|          | G3-a2           | 91.7         | 73.2        | 1.7        | 19.74                       | 18        |
|          | <b>average</b>  | <b>94.5</b>  | <b>81.1</b> | <b>3.1</b> | <b>21.22</b>                | <b>36</b> |

n is the number of individually cloned amplicons analyzed and the average of methylation rates between both alleles is weighted accordingly.
