# Supplementary material for: DNA Methylation and Expression of the EgDEF1 Gene and Neighboring Retrotransposons in mantled Somaclonal Variants of Oil Palm
Source: PLOS journal article supplement (doi:10.1371/journal.pone.0091896), 2014-03-17
Supplement: S16 (10.1371/journal.pone.0091896.s016) [file journal.pone.0091896.s016]

**Table S8: Sequence characteristics of the amplification fragments analyzed through McrBC-PCR.**

| Target region                                    | PCR fragment | Size (bp) | Number of Cs | Number of potential McrBC half-sites* |
|--------------------------------------------------|--------------|-----------|--------------|---------------------------------------|
| <i>EgDEF1</i>                                    | M1           | 298       | 77           | 5                                     |
|                                                  | M2           | 442       | 115          | 5                                     |
|                                                  | M3           | 369       | 74           | 4                                     |
| <i>gypsy</i> retrotransposon<br>( <i>Koala</i> ) | M4           | 509       | 97           | 15                                    |
|                                                  | M5-a1        | 680       | 151          | 14                                    |
|                                                  | M5-a2        | 680       | 153          | 13                                    |
| <i>copia</i> retrotransposon<br>( <i>Rider</i> ) | M6           | 749       | 169          | 44                                    |
|                                                  | M7           | 846       | 173          | 32                                    |

\*McrBC half-sites are two RmC dinucleotides (where R is A or G and mC is a methylated cytosine) separated by 55 to 103 nucleotides in optimal conditions, the cut occurring randomly between them. For the localization of each McrBC-PCR fragment on the corresponding target region (*EgDEF1* gene or retrotransposons), see Figure 1. For the list of primers used to generate these fragments, see Table S5.
